# Supplementary material for: MicroRNA-134-5p Regulates Media Degeneration through Inhibiting VSMC Phenotypic Switch and Migration in Thoracic Aortic Dissection
Source: PubMed Central journal article supplement — Mol Ther Nucleic Acids. 2019 Feb 28;16:284–94. doi: 10.1016/j.omtn.2019.02.021 (PMC6446055; doi:10.1016/j.omtn.2019.02.021), 2019-02-28
Supplement: mmc1.pdf [file mmc1.pdf]

OMTN, Volume 16

## **Supplemental Information**

### **MicroRNA-134-5p Regulates Media Degeneration through Inhibiting VSMC Phenotypic Switch and Migration in Thoracic Aortic Dissection**

**Ying Wang, Chang-Qing Dong, Guang-Yin Peng, Hao-yue Huang, Yun-sheng Yu, Zhen-Chun Ji, and Zhen-Ya Shen**

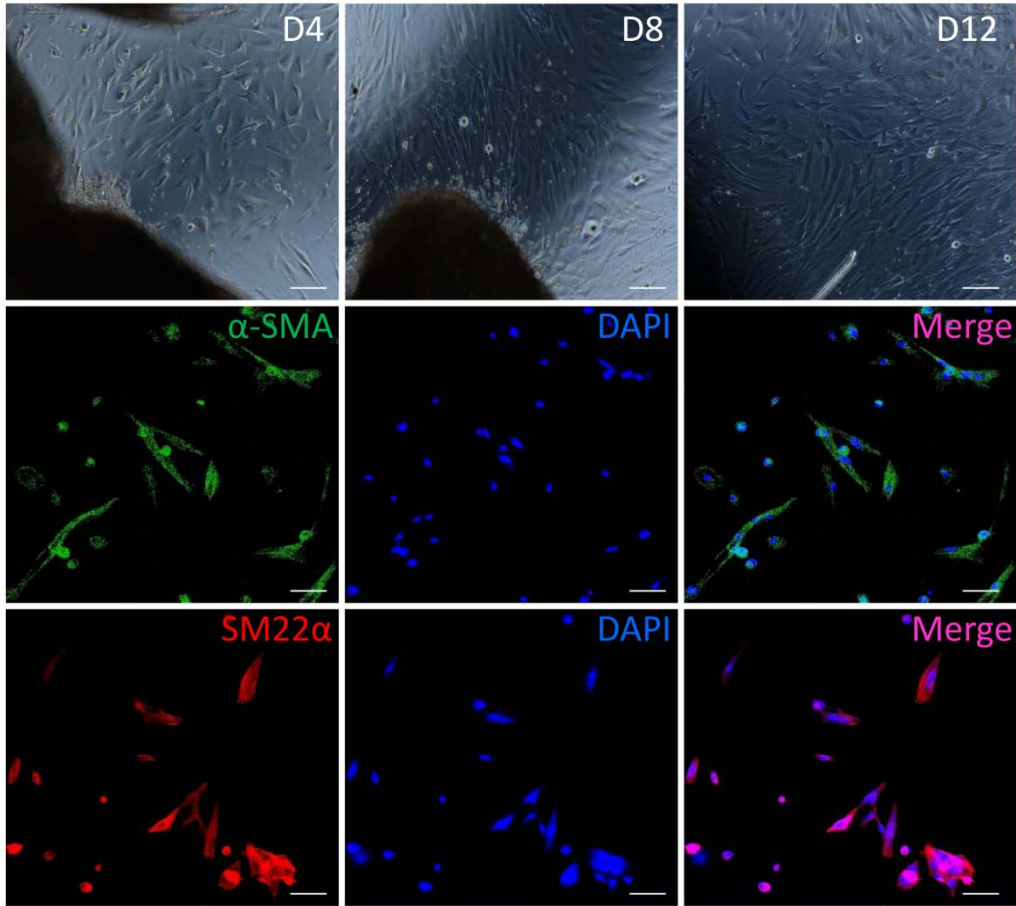

Supplement figure 1. Morphology and identification for primary culture of AoSMCs.. Upper panel: Bright field graphs for primary culture of AoSMCs from tunica media of human normal aorta tissue in Day 4, Day 8 and Day 12. Middle panel: Representative confocal-microscopy images of primary AoSMCs with immunostaining using  $\alpha$ -SMA antibody. Lower panel: Images of AoSMCs with immunostaining by SM22 $\alpha$  antibody. Green:  $\alpha$ -SMA; Red:SM22 $\alpha$ ; Blue: DAPI. Scale bar: 100 $\mu$ m.

Supplement table 1. Primers of contractile markers, matrix metalloproteinases and vascular development target genes in RT-qPCR assay.

| Gene            | Species | Primer sequence                                               | Amplicon size(bp) |
|-----------------|---------|---------------------------------------------------------------|-------------------|
| <i>18S</i>      | Human   | 5'- GTAACCCGTTGAACCCCAT -3'<br>5'- CCATCCAATCGGTAGTAGCG -3'   | 151               |
| <i>α-SMA</i>    | Human   | 5'- TCGCATCAAGGCCCAAGAAA -3'<br>5'- GGATTCCCCTCTTAGTCCCG -3'  | 210               |
| <i>SM22α</i>    | Human   | 5'- GAAACCCACCCTCTCAGTCAG -3'<br>5'- TTGGCCATGTCTGGGGAAAG -3' | 299               |
| <i>MYH11</i>    | Human   | 5'- TCACGGGAGAGCTGGAAAAG -3'<br>5'- TTGGCTCCCACGATGTAACC -3'  | 151               |
| <i>CNN1</i>     | Human   | 5'- CCAGGAGCGAGATAAGACCT -3'<br>5'- TTGGGTCCCCATCTCTCTAGG -3' | 183               |
| <i>MMP2</i>     | Human   | 5'- GCATCCAGACTTCCTCAGGC -3'<br>5'- CCATTAGCGCCTCCATCGTAG -3' | 295               |
| <i>MMP9</i>     | Human   | 5'- CGACGTCTCCAGTACCGAG -3'<br>5'- TTGTATCCGGCAAACCTGGCT -3'  | 220               |
| <i>MMP12</i>    | Human   | 5'- CGGGCAACTGGACACATCTA -3'<br>5'- AGCTTCCGGATTGCGTAGT -3'   | 184               |
| <i>ADAMTS-1</i> | Human   | 5'- TTCCCACATGATGGCGTCAA -3'<br>5'- CAGTGTGGAGTCCTCCCC -3'    | 219               |
| <i>ADAMTS-4</i> | Human   | 5'- CCACCGGAGCATCTACTTGG -3'<br>5'- AAGAAGCTGTATCGGAGGCG -3'  | 240               |
| <i>ADAMTS-7</i> | Human   | 5'- TGTGTCAACACCAGACAGG -3'<br>5'- CTCACAGCGGGGAGGCT -3'      | 125               |
| <i>COL2A1</i>   | Human   | 5'- CTGCATGAGGGCGCGGTA -3'<br>5'- CCAGTGTACAGACACAGATCC -3'   | 227               |
| <i>VEGFA</i>    | Human   | 5'- GCGGATCAAACCTCACCAAG -3'<br>5'- GCTCCAGGGCATTAGACAGC -3'  | 211               |
| <i>STAT5B</i>   | Human   | 5'- CGGGAGGAGAGTCGGCG -3'<br>5'- TTGGAGCTGCTGAGCTTGTA -3'     | 200               |
| <i>SMAD6</i>    | Human   | 5'- CACCGGAGGCACTTTTGT -3'<br>5'- GCACTTGGAGCGAGTTTCTC -3'    | 208               |
| <i>ITGB1</i>    | Human   | 5'- CCGCGGGAAAAGATGAAT -3'<br>5'- ATGTCATCTGGAGGGCAACC -3'    | 252               |
| <i>MKNK1</i>    | Human   | 5'- AAGATTGCCACCTACGCACA -3'<br>5'- TAGGCTCCCTCTCCAAGCAA -3'  | 283               |
